# Supplementary material
Source: HighWire-hosted journal article supplement (http://d2538ggaoe6cji.cloudfront.net/highwire/filestream/45507/field_highwire_adjunct_files/1/143420-2.pdf)

Appendix 2, P2/3

Rep\_3

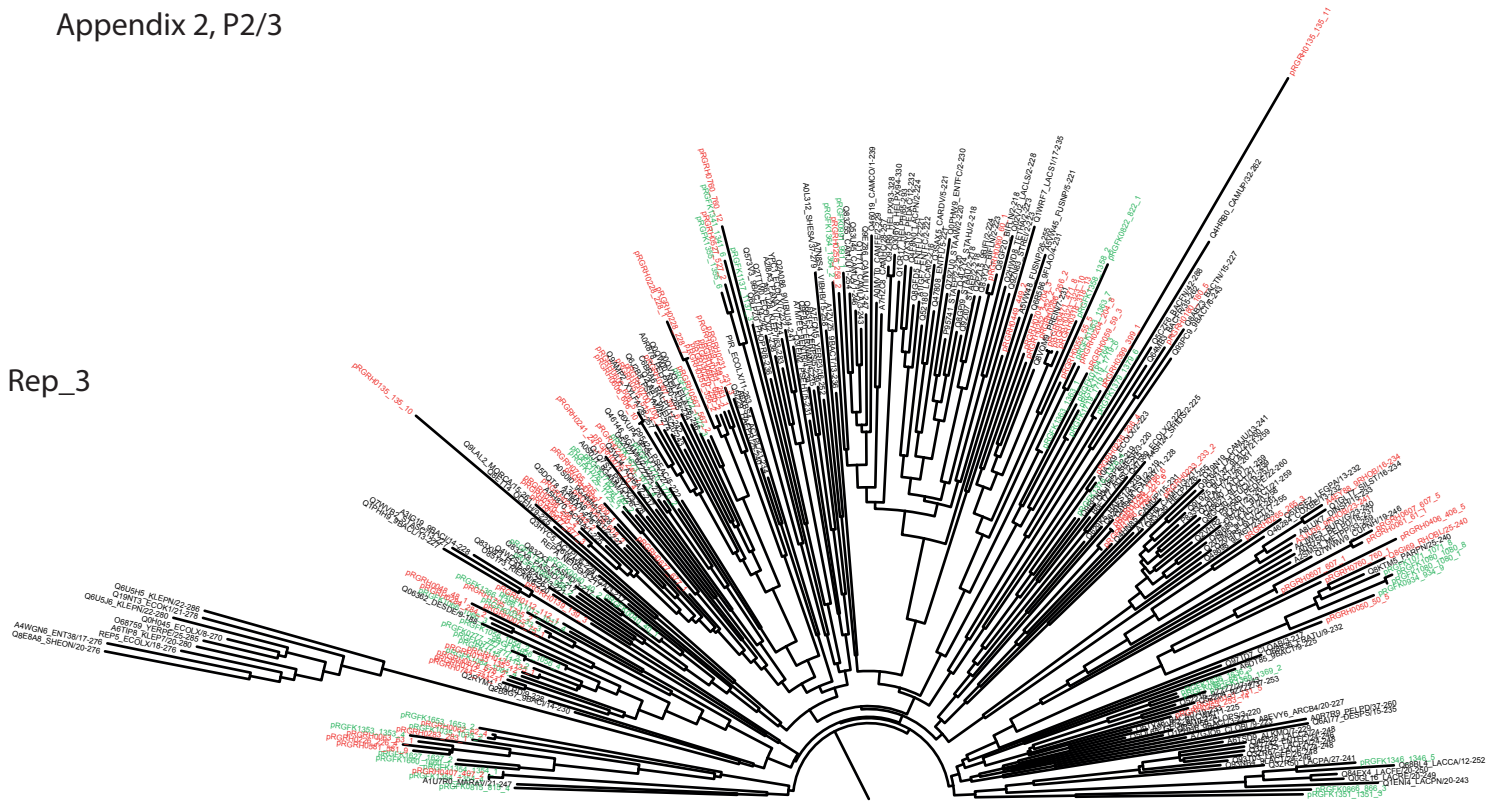

RepL

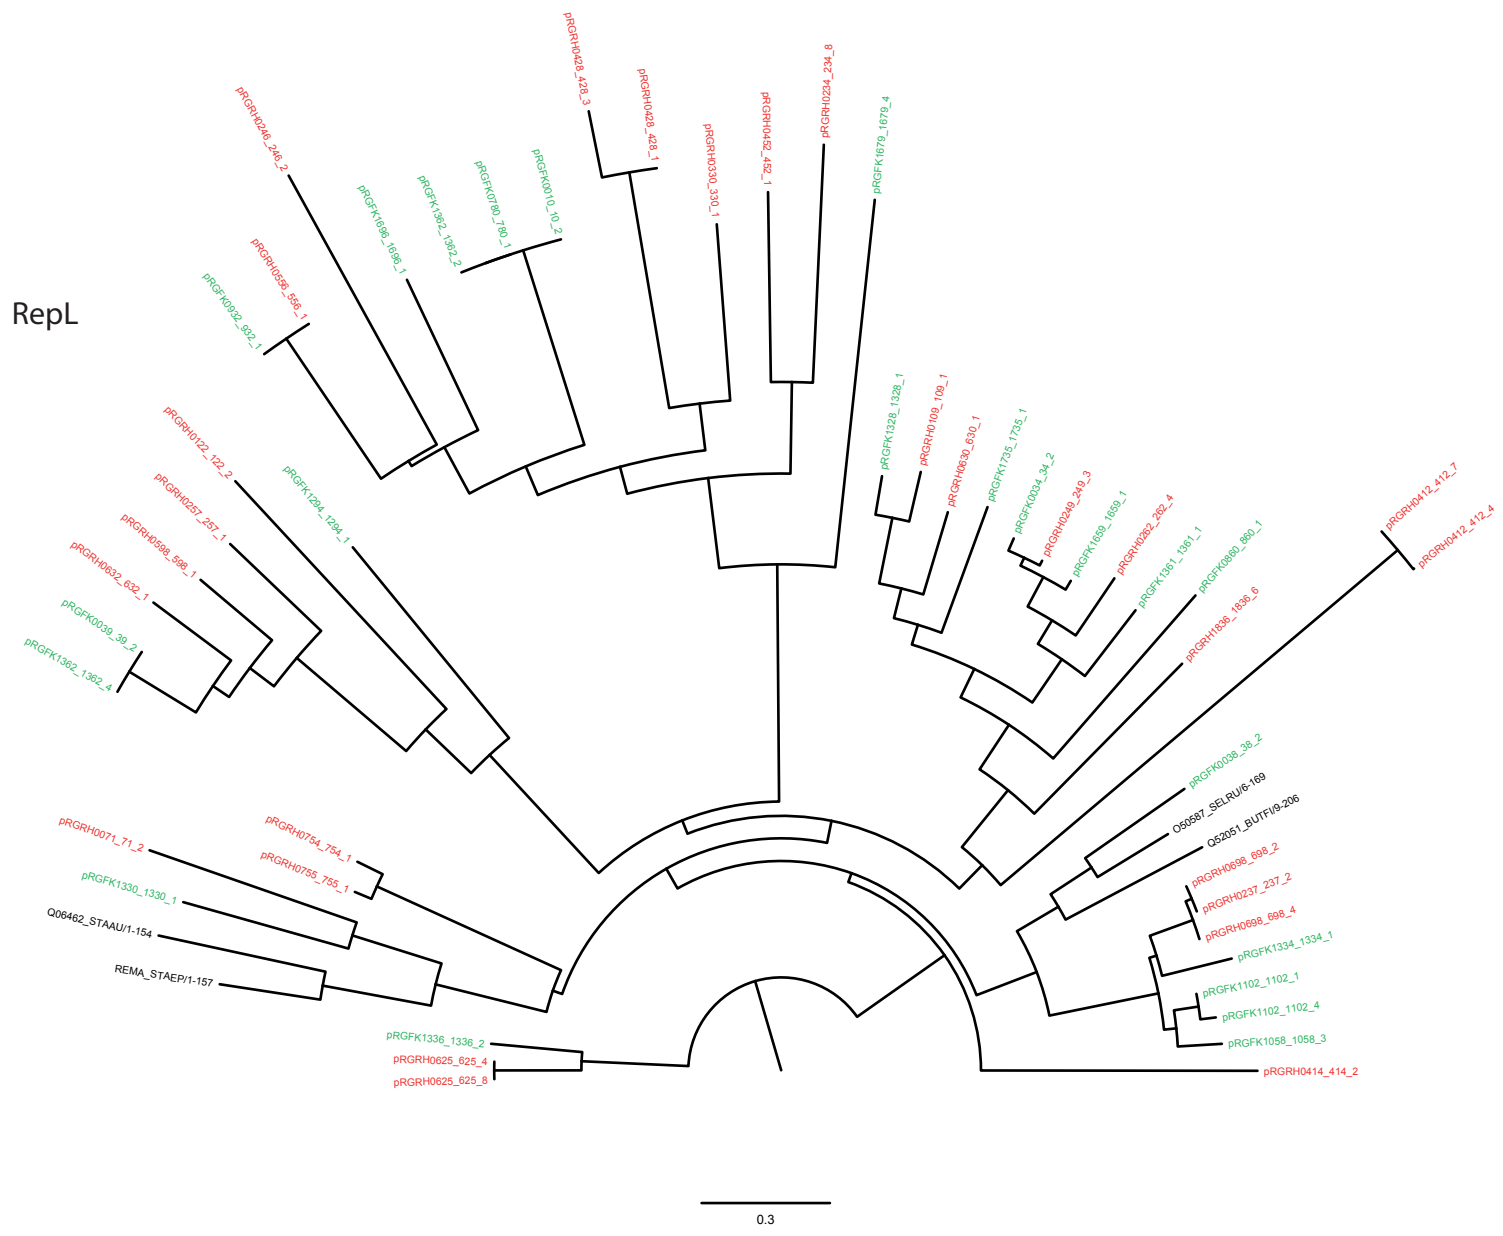

Supplement: 143420-2.pdf [file 143420-2.pdf]
